# Supplementary material
Source: publisher site journal article supplement (https://www.dovepress.com/article/489563)
Supplement: Supplementary file 1 [file get_supplementary_file.php]

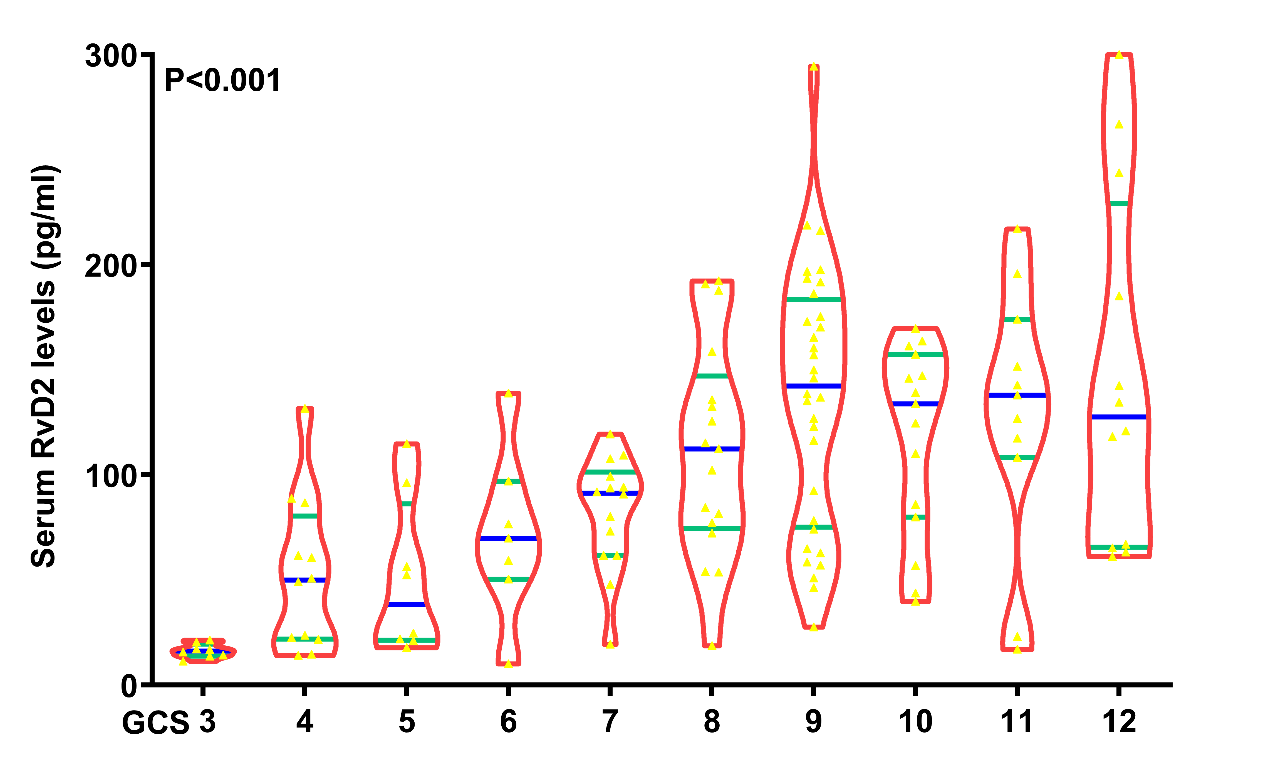
Supplemental Figure 1

**Supplemental Figure 1**

Serum resolvin D2 levels across Glasgow coma scale scores after moderate-severe traumatic brain injury.

Serum resolvin levels were markedly different among individuals with different Glasgow coma scale scores, with the highest levels in patients with a score of 12 and the lowest levels in those with a score of 3 (P<0.001).

GCS indicates Glasgow coma scale; RvD2, resolvin D2.


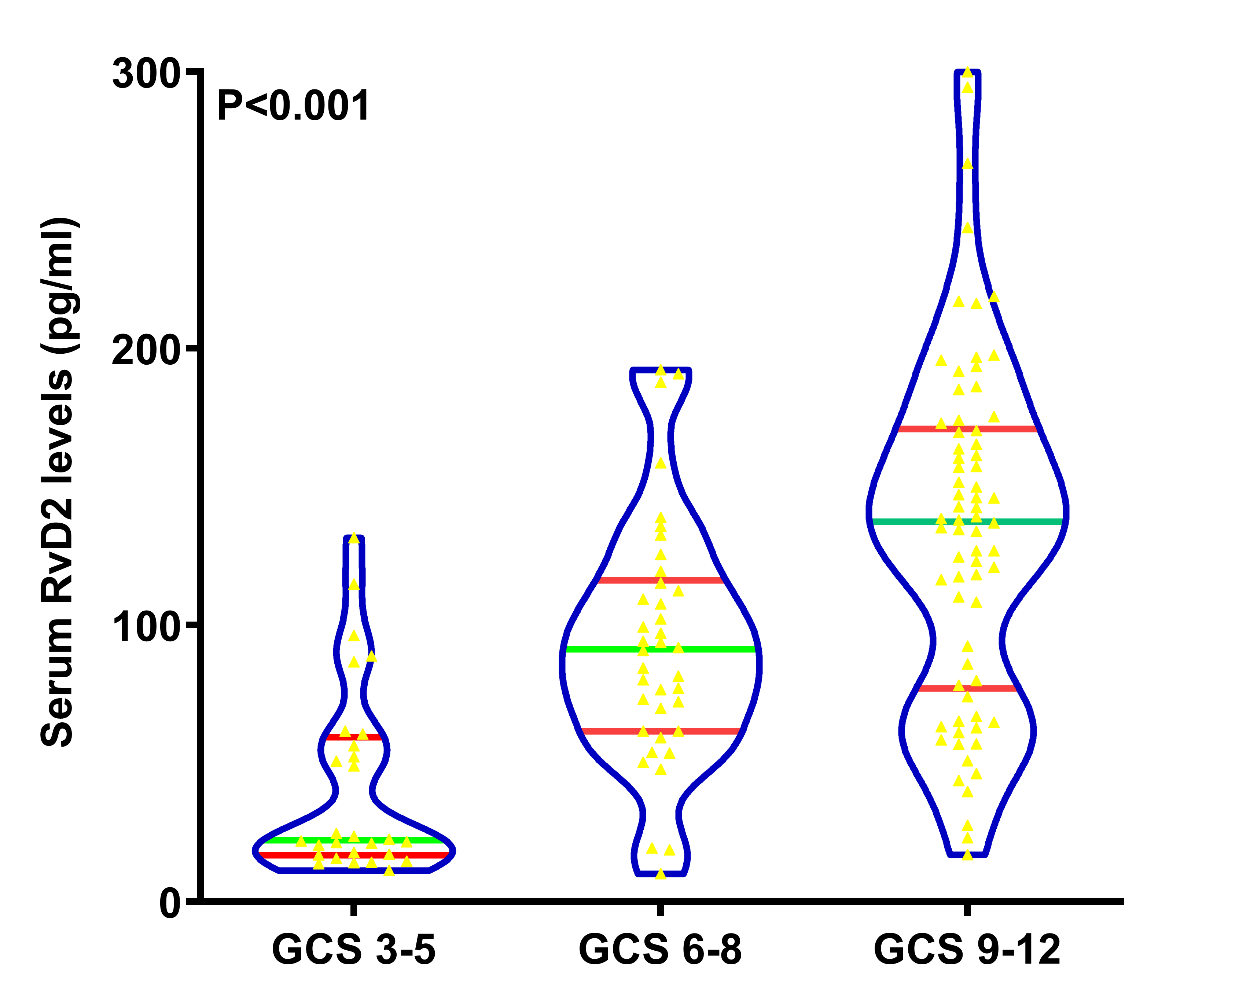
Supplemental Figure 2

**Supplemental Figure 2**

Serum resolvin D2 levels among the three subgroups pursuant to Glasgow coma scale scores after moderate-severe traumatic brain injury.

Patients were divided into three subgroups according to the Glasgow Coma scale scores, namely, the scores 3-5, 6-8 and 9-12 separately. The first subgroup had significantly lower serum resolvin D2 levels, the second subgroup had moderate levels, and the third subgroup had the highest levels (P<0.001).

GCS indicates Glasgow coma scale; RvD2, resolvin D2.


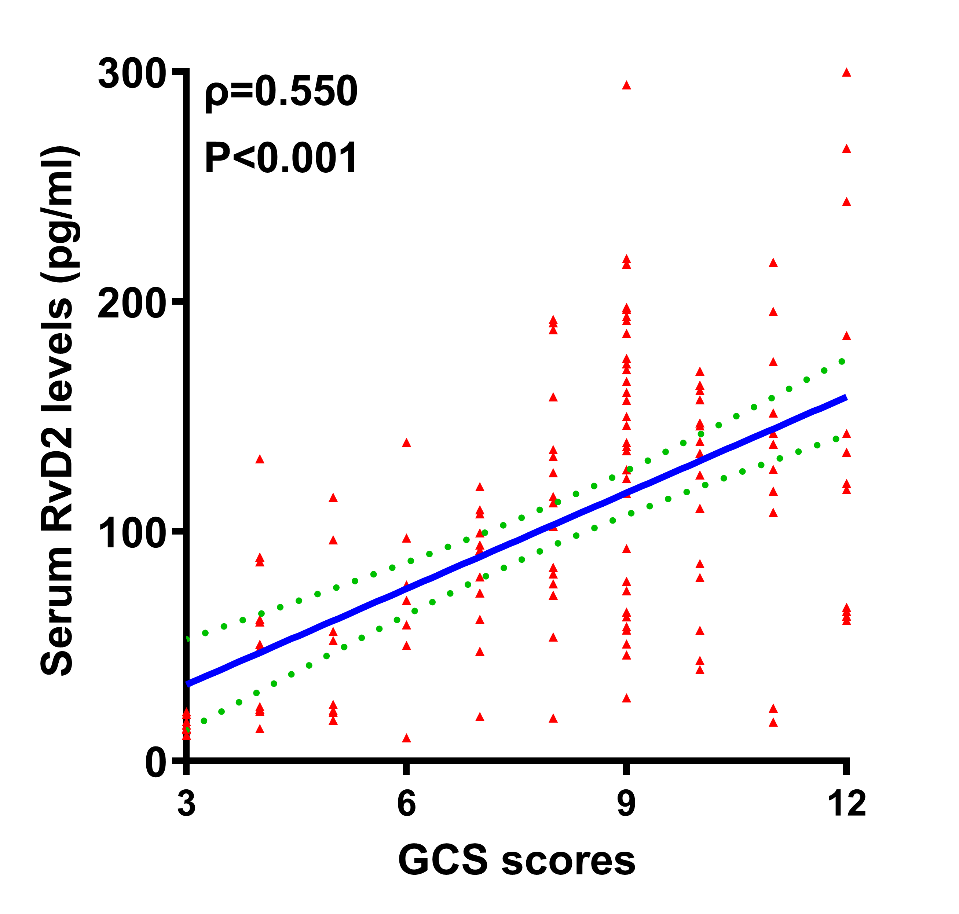


Supplemental Figure 3

**Supplemental Figure 3**

Relationship between serum resolvin D2 levels and Glasgow coma scale scores after moderate-severe traumatic brain injury.

Serum resolvin D2 levels were closely and positively correlated with Glasgow Coma Scale scores following moderate-to-severe traumatic brain injury (P<0.001).

GCS indicates Glasgow coma scale; RvD2, resolvin D2.


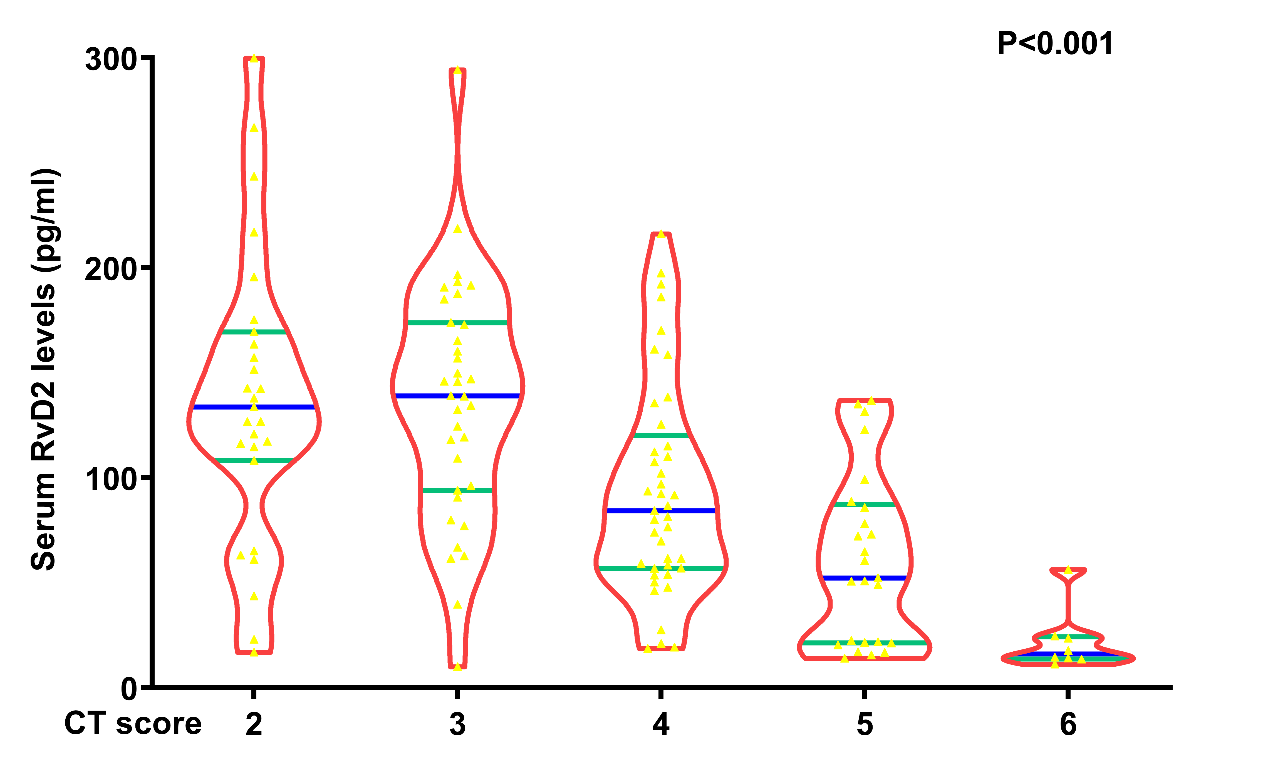


Supplemental Figure 4

**Supplemental Figure 4**

Serum resolvin D2 levels across Rotterdam computed tomography scores after moderate-severe traumatic brain injury.

Serum resolvin levels were markedly different among individuals with different Rotterdam computed tomography scores, with the highest levels in patients with a score of 2 and the lowest levels in those with a score of 6 (P<0.001).

CT indicates computed tomography; RvD2, resolvin D2.


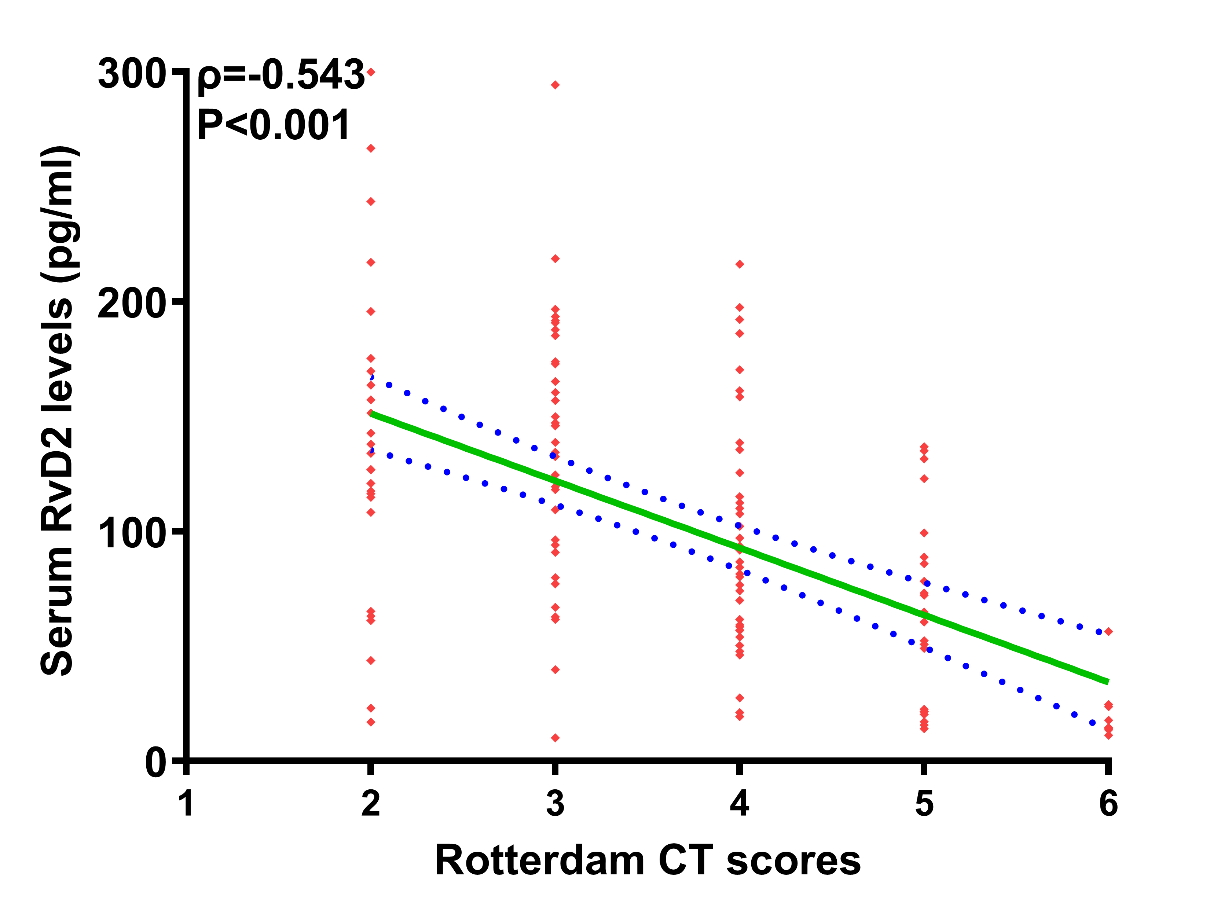


Supplemental Figure 5

**Supplemental Figure 5**

Relationship between serum resolvin D2 levels and Rotterdam computed tomography scores following moderate-severe traumatic brain injury.

Serum resolvin D2 levels were strongly and inversely correlated with Rotterdam computed tomography scores following moderate-to-severe traumatic brain injury (P<0.001).

CT indicates computed tomography; RvD2, resolvin D2.


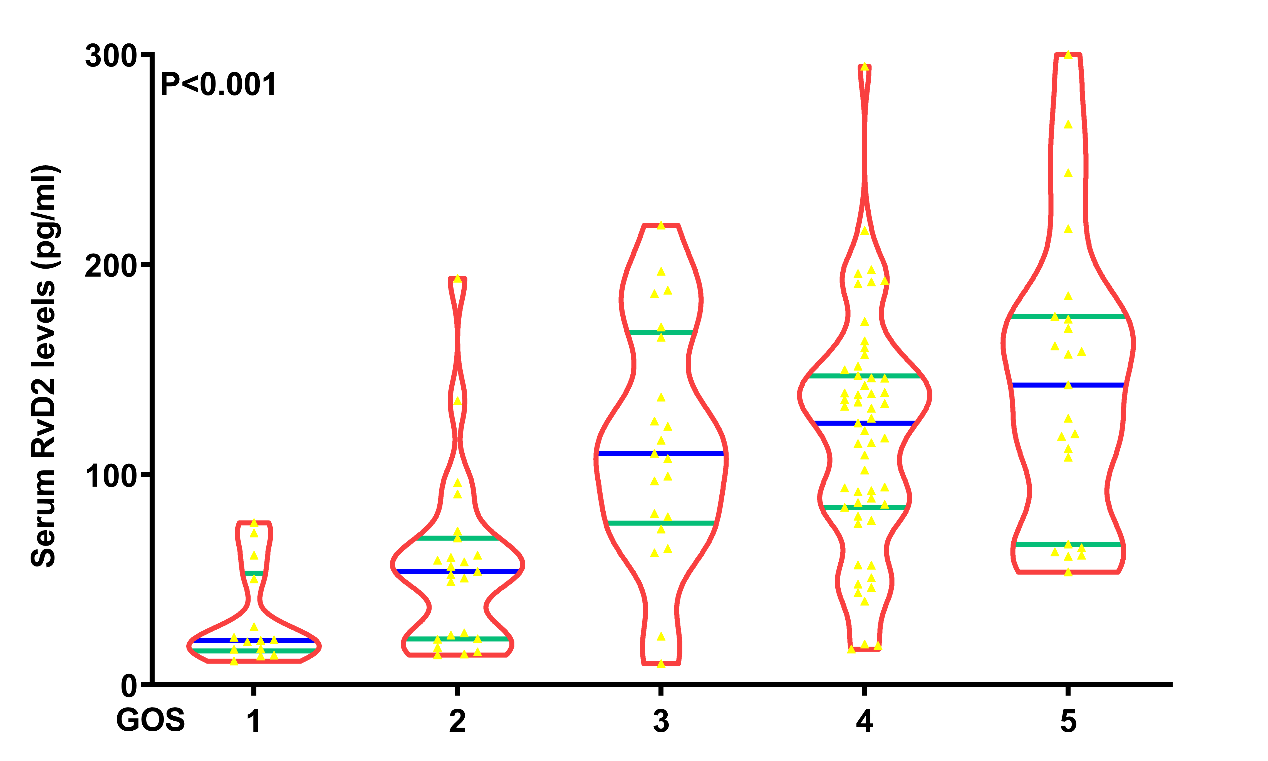


Supplemental Figure 6

**Supplemental Figure 6**

Serum resolvin D2 levels across Glasgow outcome scale scores following moderate-severe traumatic brain injury.

Serum resolvin levels were markedly different among individuals with different Glasgow Outcome Scale scores, with the highest levels in patients with a score of 5 and the lowest levels in those with a score of 1 (P<0.001).

GOS indicates Glasgow outcome scale; RvD2, resolvin D2.


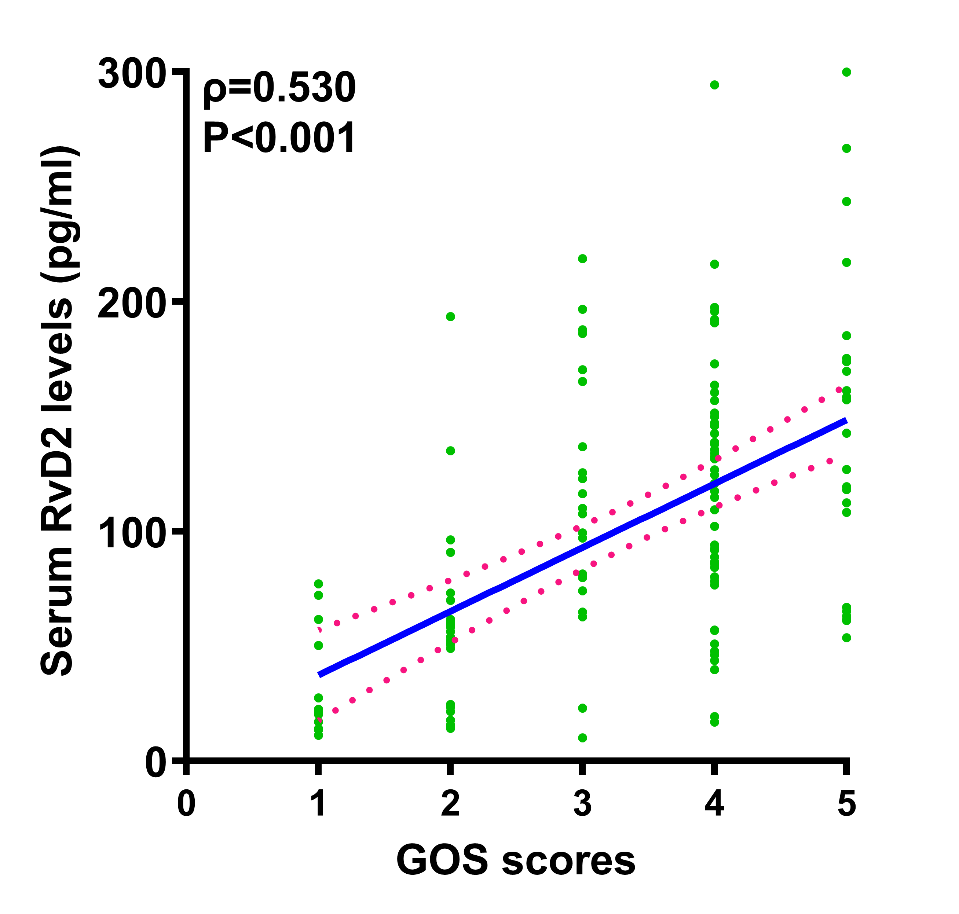


Supplemental Figure 7

**Supplemental Figure 7**

Relationship between serum resolvin D2 levels and Glasgow outcome scale scores following moderate-severe traumatic brain injury.

Serum resolvin D2 levels exhibited an intimate and positive relationship with Glasgow outcome scale scores following moderate-to-severe traumatic brain injury (P<0.001).

GOS indicates Glasgow outcome scale; RvD2, resolvin D2.


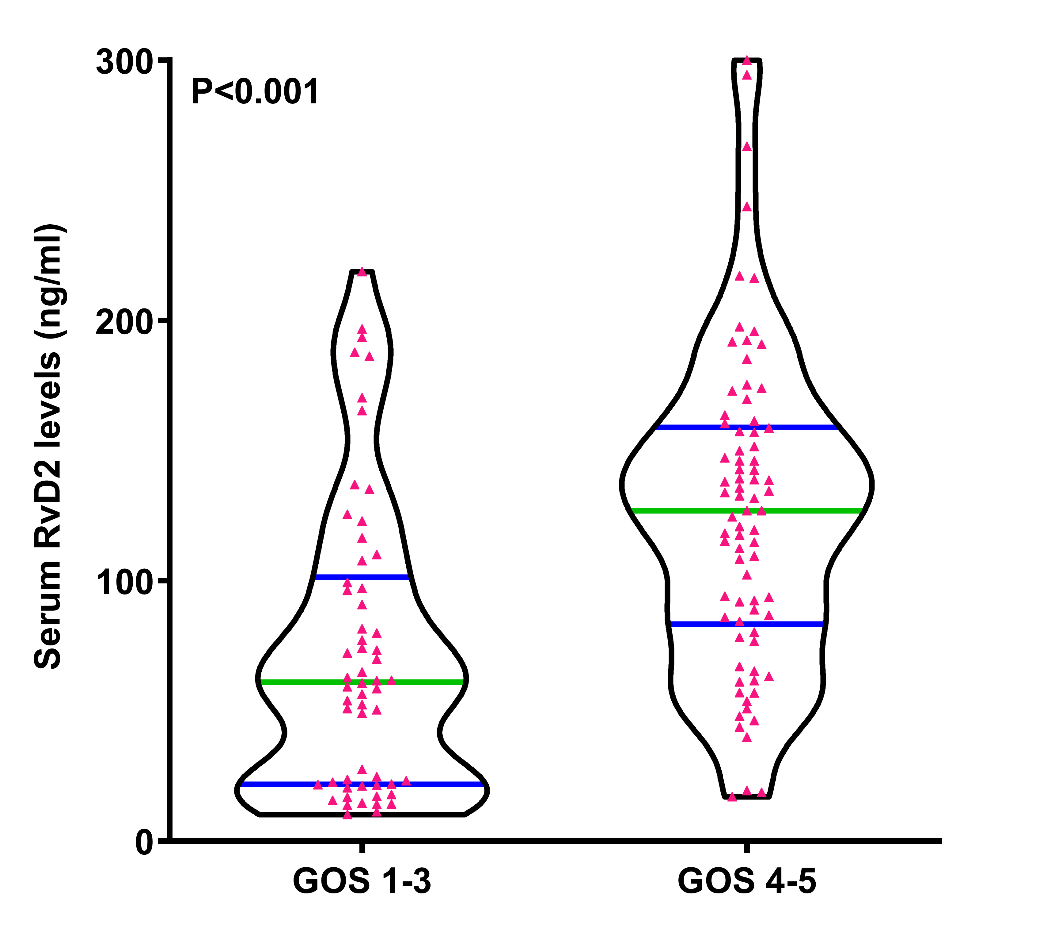


Supplemental Figure 8

**Supplemental Figure 8**

Serum resolvin D2 levels between two subgroups based on Glasgow outcome scale scores following moderate-severe traumatic brain injury.

Patients were divided into two subgroups according to their Glasgow outcome scale scores: scores 1-3 and 4-5 respectively. Patients with scores of 4-5 displayed markedly higher serum resolvin D2 levels than those with scores of 1-3 (P<0.001).

GOS indicates Glasgow outcome scale; RvD2, resolvin D2.
